# Supplementary material
Source: PubMed Central journal article supplement (PMC5469208)
Supplement: NIHMS862581-supplement-supplement_1.pdf [file NIHMS862581-supplement-supplement_1.pdf]

## Supporting Information

### Acyldepsipeptide antibiotics kill mycobacteria by preventing the physiological functions of the ClpP1P2 protease

Kirsten Famulla<sup>1</sup>, Peter Sass<sup>1</sup>, Imran Malik<sup>1</sup>, Tatos Akopian<sup>2</sup>, Olga Kandror<sup>2</sup>, Marina Alber<sup>3</sup>, Berthold Hinzen<sup>4</sup>, Helga Ruebsamen-Schaeff<sup>5</sup>, Rainer Kalscheuer<sup>3</sup>, Alfred Goldberg<sup>2</sup>, and Heike Brötz-Oesterhelt<sup>1</sup>

<sup>1</sup>Department of Microbial Bioactive Compounds, Interfaculty Institute of Microbiology and Infection Medicine, University of Tuebingen, Germany; <sup>2</sup>Department of Cell Biology, Harvard Medical School, Boston, MA; <sup>3</sup>Institute for Medical Microbiology and Hospital Hygiene, University of Duesseldorf; <sup>4</sup>Bayer Pharma AG, Wuppertal, Germany; <sup>5</sup>AiCuris GmbH & Co. KG, Wuppertal, Germany.

**Table S1.** Primer used in this study.

| primer                                                            | sequence                                        | restriction site |
|-------------------------------------------------------------------|-------------------------------------------------|------------------|
| Construction of <i>M. bovis</i> BCG Pasteur <i>clpP1-tet</i> off: |                                                 |                  |
| <i>clpP1</i> -F1-fwd                                              | 5`-TTTTTTTTCCATAAATTGGAGCCCGGTTCAATGAGTTGC-3`   | <i>Van91I</i>    |
| <i>clpP1</i> -F1-rev                                              | 5`-TTTTTTTTCCATTTCTTGGTCAGGGGCACCTGCTTTCC-3`    | <i>Van91I</i>    |
| <i>clpP1</i> -F2-fwd                                              | 5`-TTTTTTTTGCATCTTTTGCCAAACCGTATTCCAGGG-3`      | <i>BstAPI</i>    |
| <i>clpP1</i> -F2-rev                                              | 5`-TTTTTTTTGCATAGATTGCATGAGCCAAGTGACTGACATGC-3` | <i>BstAPI</i>    |
| <i>c-clpP1</i> -fwd                                               | 5`-ACGAAGCGACAACGTGAC-3`                        |                  |
| <i>c-clpP1</i> -rev                                               | 5`-GGGAATTCCTGTGCTTCTC-3`                       |                  |
| seq- <i>clpP1</i> -fwd                                            | 5`-CACGACTTCGAGGTGTTTC-3`                       |                  |
| seq- <i>clpP2</i> -rev                                            | 5`-GGGAATTCCTGTGCTTCTC-3`                       |                  |
| <i>rev-tetR</i> -fwd                                              | 5`-TTTTTGAATTCATGAGCACGATCCGCGGTACCATC-3`       | <i>EcoR1</i>     |
| <i>rev-tetR</i> -rev                                              | 5`-TTTTTAAGCTTAGGAGCCGCTCTCGCACTTCAG-3`         | <i>HindIII</i>   |
| Cloning of MTB <i>ftsZ</i> :                                      |                                                 |                  |
| MTB <i>ftsZ</i> -fwd                                              | 5`-TTTCCATGGCCCCCGCACAACTACC-3`                 | <i>NcoI</i>      |
| MTB <i>ftsZ</i> -rev                                              | 5`-AAAAAGCTTGCGGCGCATGAAGGGCGG-3`               | <i>HindIII</i>   |
| qRT-PCR of MTB <i>clpP</i> expression:                            |                                                 |                  |
| q <i>clpP1</i> -fwd                                               | 5`- TGAGCCAAGTGACTGACAT-3`                      |                  |
| q <i>clpP1</i> -rev                                               | 5`- GATGTAGAGGCTGATGTCCT-3`                     |                  |

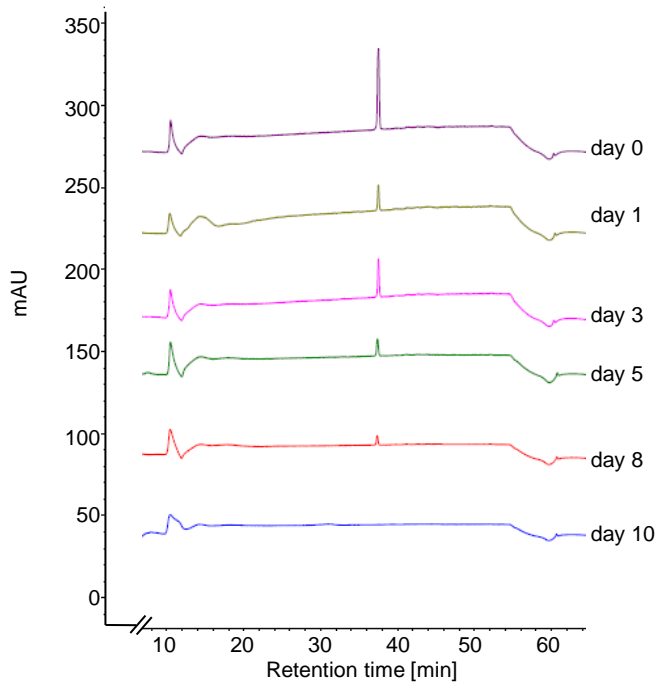

**Figure S1.** Chemical stability of ADEP2 in culture broth is limited. HPLC chromatograms at different times of incubation of ADEP2 in minimal medium at 37 °C.

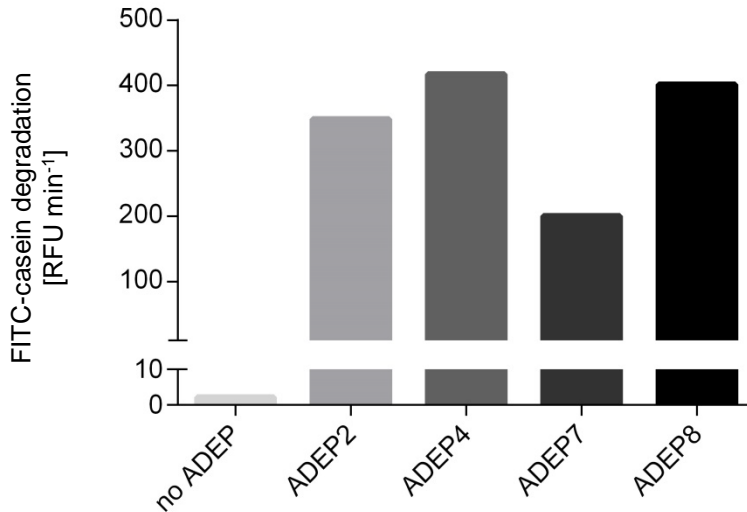

**Figure S2.** Degradation of FITC-casein by BS ClpP. Reaction rate [increase in RFU min<sup>-1</sup>] calculated from the initial linear period of enzyme activity (10 min). ADEPs activate BS ClpP much more strongly than MTB ClpP1P2 under the same assay conditions.

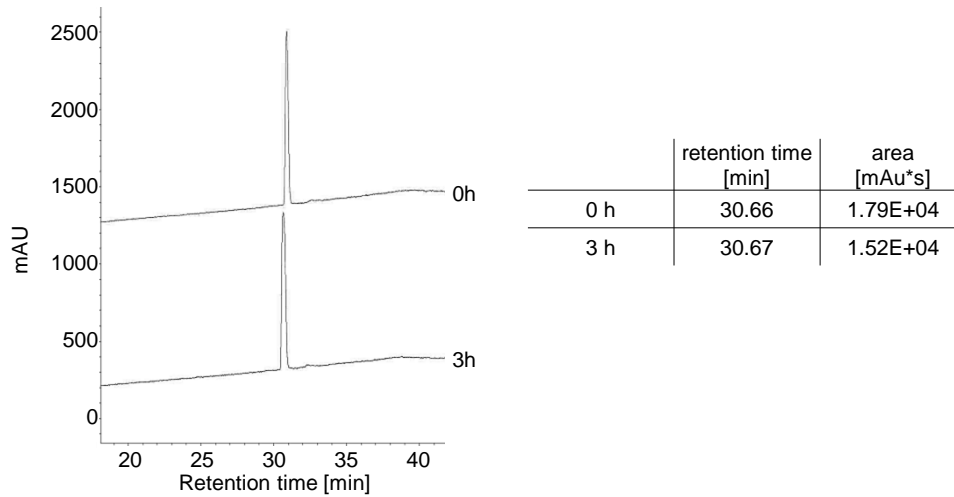

**Figure S3.** The HPLC chromatogram shows that Z-LL is not degraded by BS ClpP after 3 hours incubation at 37 °C.

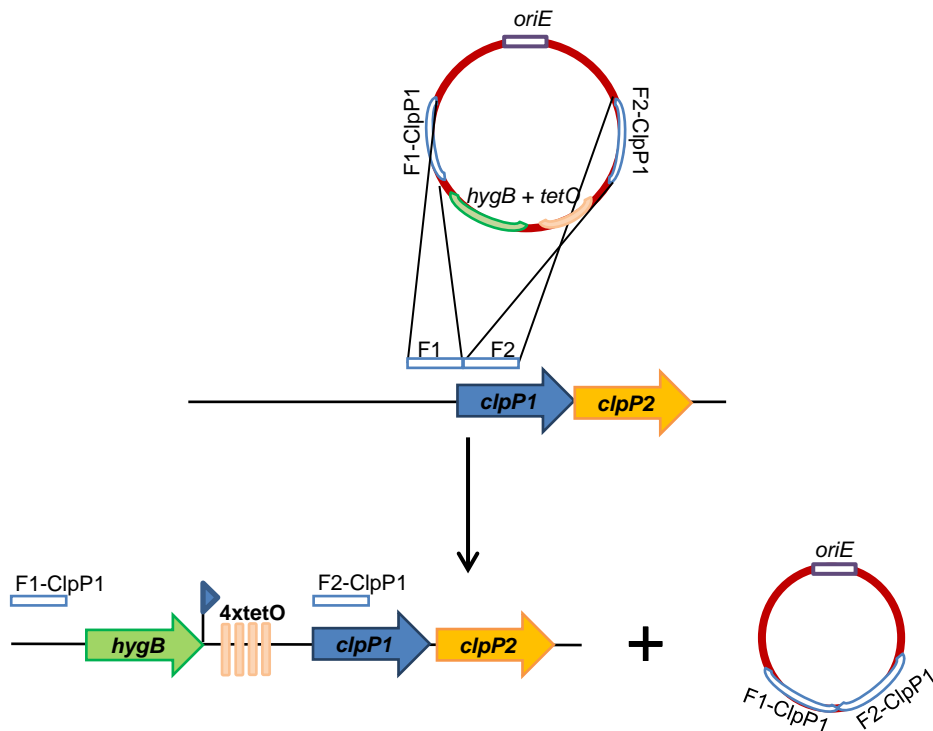

**Figure S4.** Construction of *M. bovis* BCG *clp1-tetoff*. The *hyg-Pmyc1-4xtetO* cassette was inserted upstream of the *clp1P2* operon via homologous recombination. Then, the plasmid which expresses the TetR repressor was introduced to obtain *M. bovis* BCG *clp1-tetoff*.

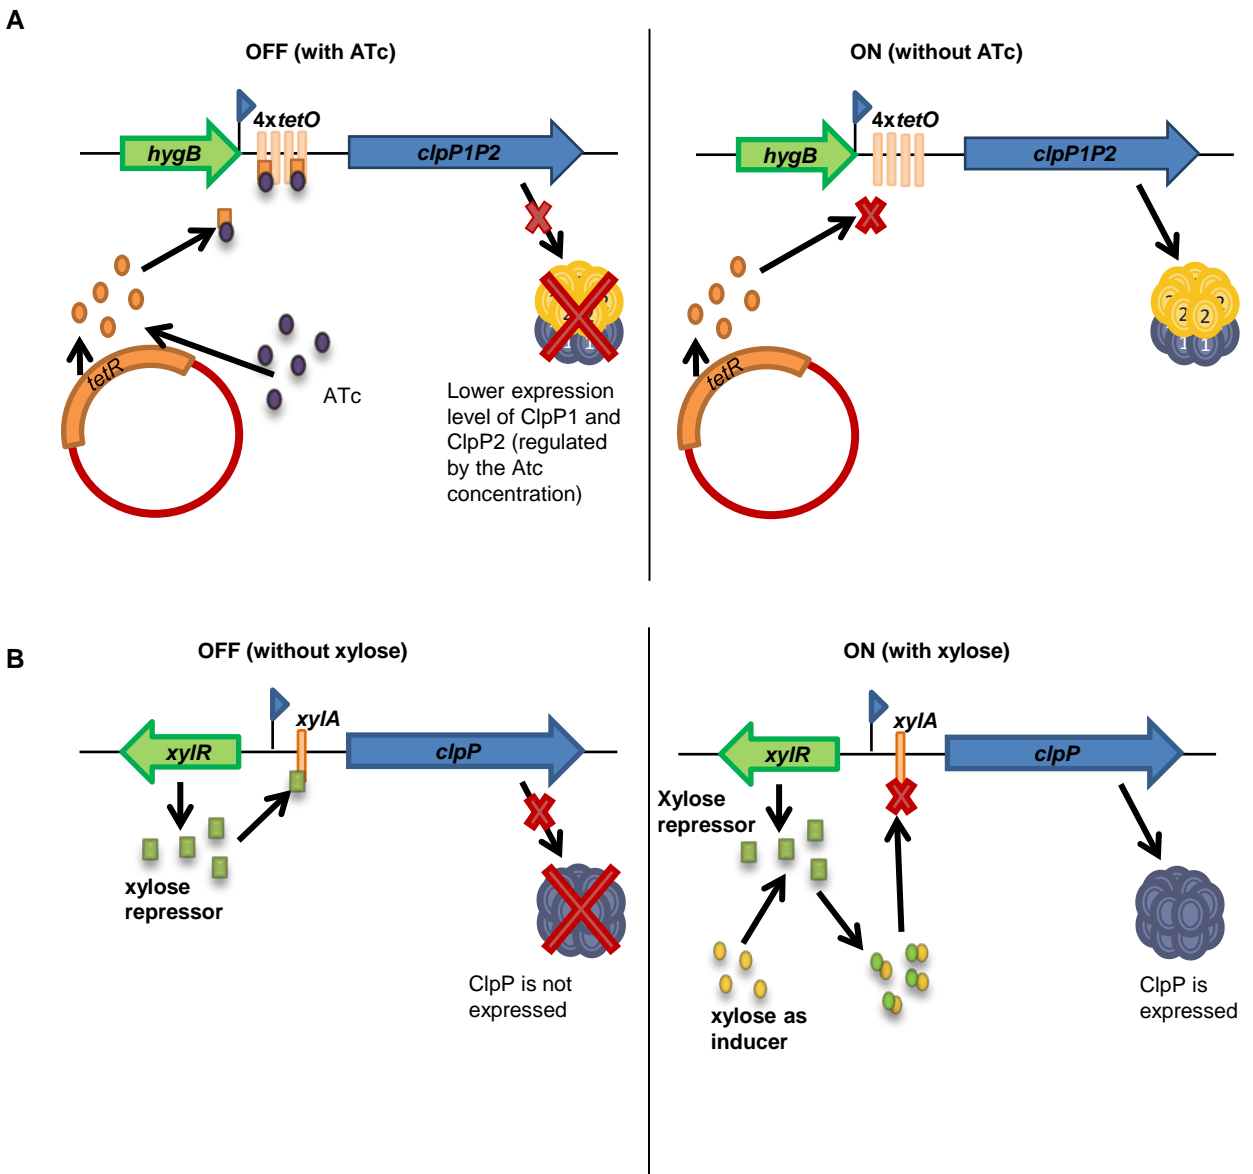

**Figure S5.** Schematic representation of the inducible mutants used in this study.

A. Operating mode of the Tet-Off system in strain *M. bovis* BCG *clpP1-tetoff* in the absence and presence of ATc. In the absence of ATc, the TetR repressor cannot bind to the *tetO* sites upstream the *clpP1P2* operon, *clpP1* and *clpP2* are expressed. In the presence of ATc, TetR undergoes a conformational change that now allows binding to the *tetO* sites. Thus, the expression level of *clpP1P2* can be regulated via the ATc concentration.

B. Operating mode of the Xyl-On system in *B. subtilis* 168-pX2-*clpP* in the absence and presence of xylose. In the absence of xylose, the repressor XylR can bind to the *xylA* operator palindrome upstream of *clpP*, thereby silencing *clpP* expression. Xylose functions as an inducer in this system. The presence of xylose leads to a conformational change in XylR, which is now incapable to bind to *xylA* operator, thereby allowing *clpP* expression
